# Supplementary material
Source: PubMed Central journal article supplement (PMC7522766)
Supplement: NIHMS1612511-supplement-2.pdf [file NIHMS1612511-supplement-2.pdf]

**Table S1. Related to Figure 1.** Patient information for surgically resected tissue samples and plasma samples.

**Tissue samples**

| Cancer type                                     | sample size (% male) | average age (yr) | stage (%)                              |
|-------------------------------------------------|----------------------|------------------|----------------------------------------|
| Lung adenocarcinoma                             | 18 (33.3)            | 63.6 (23-88)     | I(38.9); II(27.8); III(11.1); IV(22.2) |
| Pancreatic ductal adenocarcinoma                | 21 (66.7)            | 68.9 (51-83)     | I(4.8); II(71.4); III(23.8)            |
| Neuroblastoma                                   | 9 (36.4)             | 10.7 (2-35)      | IV(100)                                |
| Osteosarcoma                                    | 7 (57.1)             | 19 (14-25)       | IV(100)                                |
| Breast cancer                                   | 6 (0)                | 66.7 (57-73)     | IV(100)                                |
| Melanoma                                        | 5 (NA)               | NA               | III(100)                               |
| Colorectal cancer                               | 3 (33.3)             | 63.7 (52-77)     | 0(33.3); II(66.7)                      |
| Hepatoblastoma                                  | 3 (100)              | 2.3 (2-3)        | IV(100)                                |
| MPNST (malignant peripheral nerve sheath tumor) | 1 (100)              | 16               | IV(100)                                |
| Fibrolabellar hepatocellular carcinoma          | 2 (100)              | 15.5 (15-16)     | IV(100)                                |
| Wilms tumor                                     | 2 (100)              | 3 (1-5)          | IV(100)                                |
| Immature teratoma                               | 1 (0)                | 14               | IV(100)                                |
| Desmoplastic small-round-cell tumor             | 1 (100)              | 14               | IV(100)                                |
| Embryonal rhabdomyosarcoma                      | 2 (0)                | 5.5 (3-8)        | IV(100)                                |
| Epithelioid sarcoma                             | 1 (0)                | 16               | IV(100)                                |
| Synovial sarcoma                                | 1 (100)              | 54               | IV(100)                                |
| Renal cell carcinoma                            | 1 (100)              | 60               | IV(100)                                |
| Anaplastic ependymoma                           | 1 (0)                | 10               | IV(100)                                |
| <b>Total</b>                                    | <b>85</b>            |                  |                                        |

**Plasma samples**

| Cancer type                                     | sample size (% male) | average age (yr) | stage (%)                            |
|-------------------------------------------------|----------------------|------------------|--------------------------------------|
| Lung adenocarcinoma                             | 12 (41.7)            | 60.7 (23-78)     | I(50.0); II(41.7); III(8.3)          |
| Pancreatic ductal adenocarcinoma                | 9 (66.7)             | 69.9 (51-82)     | II(77.8); III(22.2)                  |
| Neuroblastoma                                   | 15 (66.7)            | 7 (1-34)         | III(6.7); IV(93.3)                   |
| Osteosarcoma                                    | 5 (80)               | 21.6 (14-35)     | IV(100)                              |
| Breast cancer                                   | 8 (0)                | 52.1 (38-61)     | II(25); III(12.5); IV(62.5)          |
| Melanoma                                        | 1 (NA)               | NA               | NA                                   |
| Colorectal cancer                               | 3 (33.3)             | 63.7 (52-77)     | 0(33.3); II(66.7)                    |
| Hepatoblastoma                                  | 1 (100)              | 2                | IV(100)                              |
| Germinoma                                       | 1 (NA)               | NA               | NA                                   |
| MPNST (malignant peripheral nerve sheath tumor) | 1 (100)              | 16               | IV(100)                              |
| Fibrolabellar hepatocellular carcinoma          | 2 (100)              | 15.5 (15-16)     | IV(100)                              |
| Wilms tumor                                     | 1 (100)              | 1                | IV(100)                              |
| Mesothelioma                                    | 15 (73.3)            | 64.3 (41-83)     | I(13.3); III(6.7); IV(6.7); NA(73.3) |
| DSRCT (desmoplastic small-round-cell tumor)     | 1 (100)              | 14               | IV(100)                              |
| Hodgkin's Lymphoma                              | 1 (0)                | 19               | IV(100)                              |
| Anaplastic ependymoma                           | 1 (0)                | 10               | IV(100)                              |
| <b>Total</b>                                    | <b>77</b>            |                  |                                      |

|                   |            |              |    |
|-------------------|------------|--------------|----|
| Adult control     | 28 (46.4%) | 43.5 (32-78) | NA |
| Pediatric control | 15 (80%)   | 7.2 (3-19)   | NA |
| <b>Total</b>      | <b>43</b>  |              |    |

**Plasma samples for validation experiment (ELISA and targeted mass spectrometry)**

| Cancer type                      | sample size (% male) | average age (yr) | stage (%)                       |
|----------------------------------|----------------------|------------------|---------------------------------|
| Lung adenocarcinoma              | 8 (12.5)             | 67.5 (48-80)     | I (25.0); II (75.0)             |
| Pancreatic ductal adenocarcinoma | 15 (86.7)            | 69.7 (54-87)     | I (33.3); II (33.3); III (33.3) |
| <b>Total</b>                     | <b>23</b>            |                  |                                 |

|                  |           |              |    |
|------------------|-----------|--------------|----|
| Healthy controls | 15 (13.3) | 45.1 (34-59) | NA |
| <b>Total</b>     | <b>15</b> |              |    |

**Table S2. Related to figure 1.** Gene ontology analysis using Metascape (<http://metascape.org/>) for the 13 common EVP cargo proteins detected in more than 50% of human samples.

| Category                | Term          | Description                                    | Proteins                                              | Log <i>P</i> | Log (q-value) |
|-------------------------|---------------|------------------------------------------------|-------------------------------------------------------|--------------|---------------|
| Reactome Gene Sets      | R-HSA-109582  | Hemostasis                                     | A2M,ACTB,FLNA,FN1,HBB,JCHAIN,LGALS3BP,RAP1B,YWHAZ,MSN | -10.9        | -6.6          |
| GO Biological Processes | GO:0045055    | regulated exocytosis                           | A2M,B2M,STOM,FLNA,FN1,GSN,HBB,LGALS3BP,RAP1B          | -10.2        | -6.2          |
| GO Biological Processes | GO:0042060    | wound healing                                  | A2M,ACTB,FLNA,FN1,GSN,HBB,YWHAZ,MSN                   | -8.0         | -4.2          |
| Reactome Gene Sets      | R-HSA-6802948 | Signaling by high-kinase activity BRAF mutants | ACTB,FN1,RAP1B,FLNA                                   | -5.9         | -2.7          |
| GO Biological Processes | GO:1905475    | regulation of protein localization to membrane | ACTB,STOM,GSN,YWHAZ,MSN,RAP1B,FLNA,FN1                | -5.7         | -2.6          |
| GO Biological Processes | GO:0006897    | endocytosis                                    | ACTB,B2M,GSN,HBB,JCHAIN,LGALS3BP                      | -5.5         | -2.5          |
| KEGG Pathway            | hsa05205      | Proteoglycans in cancer                        | ACTB,FLNA,FN1,MSN,GSN,B2M                             | -5.3         | -2.3          |
| KEGG Pathway            | hsa04810      | Regulation of actin cytoskeleton               | ACTB,FN1,GSN,MSN,HBB,FLNA,JCHAIN,YWHAZ,B2M            | -5.2         | -2.3          |
| Reactome Gene Sets      | R-HSA-1280215 | Cytokine Signaling in Immune system            | B2M,FN1,MSN,RAP1B,YWHAZ,ACTB,GSN,FLNA,STOM            | -4.4         | -1.8          |
| GO Biological Processes | GO:0003014    | renal system process                           | GSN,HBB,JCHAIN,ACTB,YWHAZ,STOM                        | -4.4         | -1.7          |
| GO Biological Processes | GO:0009636    | response to toxic substance                    | ACTB,GSN,HBB,PRDX2,B2M                                | -3.7         | -1.1          |
| GO Biological Processes | GO:0034762    | regulation of transmembrane transport          | ACTB,STOM,FLNA,GSN,RAP1B                              | -2.4         | -0.1          |
| Reactome Gene Sets      | R-HSA-382551  | Transport of small molecules                   | A2M,STOM,HBB                                          | -2.1         | 0.0           |

**Table S4. Related to Figure 2.** Complete list of tumor-enriched EVP proteins in lung adenocarcinoma. A total 123 proteins were identified across 14 LuCa pairs by mass spectrometry based on the following parameters:  $\geq 10$ -fold difference in levels, FDR  $< 0.05$ , and positivity in  $\geq 50\%$  tumors. **Bolded proteins are exclusively expressed in tumor tissues.**

| protein        | false discovery rate (FDR) | $\log_{10}$ fold change (tumor / normal) | positivity in tumor tissue (n=14) | positivity in normal tissue (n=22) | Positivity in adjacent tissue (n=14) | Positivity in distant tissue (n=8) |
|----------------|----------------------------|------------------------------------------|-----------------------------------|------------------------------------|--------------------------------------|------------------------------------|
| FHL2           | 0.012                      | 5.4                                      | 79%                               | 9%                                 | 7%                                   | 13%                                |
| XRN2           | 0.012                      | 5.4                                      | 79%                               | 9%                                 | 14%                                  | 0%                                 |
| GLRX           | 0.012                      | 4.9                                      | 86%                               | 23%                                | 36%                                  | 0%                                 |
| HDLBP          | 0.012                      | 4.8                                      | 86%                               | 27%                                | 36%                                  | 13%                                |
| SRRT           | 0.032                      | 4.7                                      | 79%                               | 18%                                | 29%                                  | 0%                                 |
| RCC1           | 0.012                      | 4.6                                      | 79%                               | 23%                                | 36%                                  | 0%                                 |
| AP3S1          | 0.012                      | 4.6                                      | 86%                               | 27%                                | 29%                                  | 25%                                |
| SNRPD3         | 0.022                      | 4.6                                      | 79%                               | 18%                                | 21%                                  | 13%                                |
| NOP2           | 0.012                      | 4.6                                      | 64%                               | 5%                                 | 7%                                   | 0%                                 |
| RPL22          | 0.022                      | 4.5                                      | 86%                               | 36%                                | 43%                                  | 25%                                |
| DNAJC7         | 0.012                      | 4.5                                      | 64%                               | 5%                                 | 7%                                   | 0%                                 |
| STK39          | 0.012                      | 4.5                                      | 71%                               | 14%                                | 14%                                  | 13%                                |
| SRP54          | 0.012                      | 4.3                                      | 86%                               | 32%                                | 43%                                  | 13%                                |
| DHX36          | 0.012                      | 4.3                                      | 86%                               | 27%                                | 36%                                  | 13%                                |
| ELAVL1         | 0.022                      | 4.3                                      | 64%                               | 9%                                 | 7%                                   | 13%                                |
| THBS2          | 0.012                      | 4.3                                      | 71%                               | 18%                                | 29%                                  | 0%                                 |
| ACO2           | 0.040                      | 4.3                                      | 86%                               | 32%                                | 43%                                  | 13%                                |
| ACBD3          | 0.022                      | 4.2                                      | 71%                               | 18%                                | 21%                                  | 13%                                |
| SRP9           | 0.012                      | 4.1                                      | 57%                               | 5%                                 | 7%                                   | 0%                                 |
| THOC2          | 0.012                      | 4.1                                      | 79%                               | 23%                                | 29%                                  | 13%                                |
| HNRNPC         | 0.012                      | 4.1                                      | 100%                              | 55%                                | 79%                                  | 13%                                |
| EIF5B          | 0.012                      | 4.1                                      | 93%                               | 41%                                | 43%                                  | 38%                                |
| RALY           | 0.012                      | 4.0                                      | 57%                               | 5%                                 | 7%                                   | 0%                                 |
| UCHL5          | 0.022                      | 4.0                                      | 57%                               | 5%                                 | 0%                                   | 13%                                |
| KHDRBS1        | 0.040                      | 4.0                                      | 79%                               | 32%                                | 50%                                  | 0%                                 |
| SF3B6          | 0.040                      | 4.0                                      | 86%                               | 36%                                | 57%                                  | 0%                                 |
| WDR44          | 0.012                      | 4.0                                      | 93%                               | 41%                                | 50%                                  | 25%                                |
| BABAM2         | 0.022                      | 4.0                                      | 86%                               | 36%                                | 50%                                  | 13%                                |
| <b>HTATIP2</b> | 0.012                      | 3.9                                      | 50%                               | 0%                                 | 0%                                   | 0%                                 |
| CSTF3          | 0.012                      | 3.9                                      | 57%                               | 5%                                 | 7%                                   | 0%                                 |
| RPL38          | 0.012                      | 3.9                                      | 57%                               | 9%                                 | 7%                                   | 13%                                |
| RPL35A         | 0.040                      | 3.9                                      | 86%                               | 41%                                | 50%                                  | 25%                                |
| POLR2L         | 0.012                      | 3.8                                      | 64%                               | 14%                                | 14%                                  | 13%                                |
| NUP43          | 0.012                      | 3.8                                      | 64%                               | 14%                                | 14%                                  | 13%                                |
| CKAP5          | 0.022                      | 3.8                                      | 64%                               | 14%                                | 21%                                  | 0%                                 |
| FBLIM1         | 0.012                      | 3.8                                      | 71%                               | 23%                                | 21%                                  | 25%                                |
| GLA            | 0.022                      | 3.8                                      | 57%                               | 9%                                 | 14%                                  | 0%                                 |
| DCPS           | 0.040                      | 3.8                                      | 57%                               | 9%                                 | 14%                                  | 0%                                 |
| TPRKB          | 0.022                      | 3.8                                      | 71%                               | 23%                                | 29%                                  | 13%                                |
| ESRP1          | 0.040                      | 3.8                                      | 64%                               | 14%                                | 14%                                  | 13%                                |
| PABPC4         | 0.022                      | 3.8                                      | 100%                              | 55%                                | 71%                                  | 25%                                |
| GORASP2        | 0.022                      | 3.8                                      | 71%                               | 27%                                | 36%                                  | 13%                                |
| VCAN           | 0.048                      | 3.7                                      | 71%                               | 27%                                | 21%                                  | 38%                                |
| RPS17          | 0.032                      | 3.7                                      | 64%                               | 18%                                | 21%                                  | 13%                                |
| PGM2L1         | 0.022                      | 3.7                                      | 79%                               | 32%                                | 14%                                  | 63%                                |
| RANGAP1        | 0.022                      | 3.7                                      | 86%                               | 41%                                | 43%                                  | 38%                                |
| COG5           | 0.012                      | 3.7                                      | 57%                               | 9%                                 | 14%                                  | 0%                                 |
| LSM4           | 0.012                      | 3.7                                      | 71%                               | 27%                                | 36%                                  | 13%                                |
| CTNBL1         | 0.040                      | 3.6                                      | 71%                               | 23%                                | 29%                                  | 13%                                |
| FEN1           | 0.040                      | 3.6                                      | 50%                               | 5%                                 | 7%                                   | 0%                                 |
| CPSF7          | 0.032                      | 3.6                                      | 79%                               | 32%                                | 43%                                  | 13%                                |
| TEP1           | 0.012                      | 3.6                                      | 93%                               | 45%                                | 36%                                  | 63%                                |
| DHX16          | 0.040                      | 3.6                                      | 57%                               | 14%                                | 14%                                  | 13%                                |
| <b>METTL1</b>  | 0.032                      | 3.6                                      | 50%                               | 0%                                 | 0%                                   | 0%                                 |
| TBC1D8B        | 0.048                      | 3.5                                      | 57%                               | 14%                                | 21%                                  | 0%                                 |
| POLR2C         | 0.022                      | 3.5                                      | 64%                               | 18%                                | 21%                                  | 13%                                |
| PSPC1          | 0.022                      | 3.5                                      | 64%                               | 23%                                | 29%                                  | 13%                                |
| TRA2B          | 0.040                      | 3.5                                      | 64%                               | 18%                                | 29%                                  | 0%                                 |

|         |       |     |      |     |      |      |
|---------|-------|-----|------|-----|------|------|
| SF3A3   | 0.032 | 3.5 | 50%  | 5%  | 7%   | 0%   |
| RPF2    | 0.022 | 3.5 | 50%  | 5%  | 7%   | 0%   |
| NAA50   | 0.032 | 3.5 | 71%  | 27% | 29%  | 25%  |
| TP53RK  | 0.032 | 3.5 | 64%  | 23% | 29%  | 13%  |
| USP39   | 0.032 | 3.4 | 79%  | 36% | 36%  | 38%  |
| RPP30   | 0.012 | 3.4 | 50%  | 5%  | 7%   | 0%   |
| METAP1  | 0.040 | 3.4 | 64%  | 23% | 29%  | 13%  |
| NCL     | 0.040 | 3.4 | 64%  | 23% | 21%  | 25%  |
| NSUN2   | 0.048 | 3.4 | 86%  | 45% | 50%  | 38%  |
| RRP12   | 0.040 | 3.4 | 50%  | 5%  | 7%   | 0%   |
| PSMD4   | 0.040 | 3.4 | 79%  | 36% | 29%  | 50%  |
| FAM91A1 | 0.032 | 3.4 | 93%  | 50% | 50%  | 50%  |
| HERC4   | 0.048 | 3.4 | 79%  | 36% | 50%  | 13%  |
| ASCC2   | 0.048 | 3.4 | 50%  | 5%  | 7%   | 0%   |
| RAE1    | 0.048 | 3.4 | 79%  | 36% | 50%  | 13%  |
| FLAD1   | 0.032 | 3.4 | 50%  | 5%  | 7%   | 0%   |
| KHSRP   | 0.048 | 3.3 | 79%  | 36% | 43%  | 25%  |
| HEATR5B | 0.022 | 3.3 | 50%  | 5%  | 7%   | 0%   |
| PAICS   | 0.032 | 3.3 | 79%  | 36% | 36%  | 38%  |
| DBR1    | 0.048 | 3.3 | 57%  | 14% | 21%  | 0%   |
| SEC23IP | 0.040 | 3.3 | 93%  | 55% | 64%  | 38%  |
| DTX3L   | 0.022 | 3.2 | 86%  | 45% | 50%  | 38%  |
| NPM1    | 0.040 | 3.2 | 86%  | 50% | 57%  | 38%  |
| MRE11   | 0.022 | 3.2 | 50%  | 9%  | 14%  | 0%   |
| NT5C3A  | 0.012 | 3.1 | 50%  | 9%  | 7%   | 13%  |
| CSTF1   | 0.048 | 3.1 | 50%  | 9%  | 0%   | 25%  |
| SUB1    | 0.040 | 3.1 | 93%  | 59% | 57%  | 63%  |
| PABPC1  | 0.022 | 3.1 | 100% | 64% | 79%  | 38%  |
| LUC7L2  | 0.022 | 3.1 | 50%  | 9%  | 7%   | 13%  |
| DDX23   | 0.022 | 3.1 | 50%  | 9%  | 7%   | 13%  |
| PYCR3   | 0.048 | 3.1 | 50%  | 14% | 14%  | 13%  |
| CASP8   | 0.012 | 3.0 | 50%  | 9%  | 7%   | 13%  |
| ZFPL1   | 0.032 | 3.0 | 50%  | 14% | 14%  | 13%  |
| BSG     | 0.040 | 3.0 | 50%  | 14% | 21%  | 0%   |
| TNC     | 0.022 | 3.0 | 64%  | 27% | 36%  | 13%  |
| SCYL1   | 0.048 | 2.9 | 86%  | 50% | 50%  | 50%  |
| ITPA    | 0.048 | 2.9 | 93%  | 59% | 57%  | 63%  |
| DPP8    | 0.048 | 2.9 | 50%  | 9%  | 14%  | 0%   |
| RANBP1  | 0.032 | 2.9 | 50%  | 14% | 21%  | 0%   |
| PACS1   | 0.032 | 2.7 | 50%  | 14% | 7%   | 25%  |
| TARS    | 0.012 | 2.6 | 100% | 73% | 79%  | 63%  |
| SEC24D  | 0.012 | 2.3 | 100% | 77% | 79%  | 75%  |
| RPL9    | 0.012 | 2.2 | 100% | 77% | 86%  | 63%  |
| SYNCRIP | 0.032 | 2.1 | 100% | 77% | 79%  | 75%  |
| CUL4B   | 0.032 | 2.1 | 100% | 77% | 86%  | 63%  |
| NANS    | 0.012 | 2.0 | 100% | 82% | 86%  | 75%  |
| SRP68   | 0.012 | 1.9 | 100% | 82% | 86%  | 75%  |
| RCC2    | 0.022 | 1.8 | 100% | 82% | 86%  | 75%  |
| GIT2    | 0.012 | 1.6 | 100% | 82% | 86%  | 75%  |
| RPS7    | 0.022 | 1.6 | 100% | 86% | 86%  | 88%  |
| GMDS    | 0.022 | 1.6 | 100% | 86% | 79%  | 100% |
| ELOB    | 0.032 | 1.5 | 100% | 86% | 93%  | 75%  |
| MCTS1   | 0.022 | 1.5 | 100% | 86% | 93%  | 75%  |
| CTSB    | 0.012 | 1.3 | 100% | 91% | 93%  | 88%  |
| RPS11   | 0.022 | 1.3 | 100% | 91% | 93%  | 88%  |
| ARFGEF1 | 0.022 | 1.2 | 100% | 91% | 93%  | 88%  |
| RPL3    | 0.022 | 1.2 | 100% | 91% | 93%  | 88%  |
| FBLN2   | 0.022 | 1.2 | 100% | 91% | 86%  | 100% |
| GARS    | 0.022 | 1.2 | 100% | 91% | 93%  | 88%  |
| RPL7    | 0.040 | 1.2 | 100% | 91% | 93%  | 88%  |
| RPS14   | 0.040 | 1.1 | 100% | 91% | 93%  | 88%  |
| AARS    | 0.032 | 1.1 | 100% | 91% | 93%  | 88%  |
| GLB1    | 0.012 | 1.1 | 100% | 91% | 93%  | 88%  |
| RPS18   | 0.022 | 1.0 | 100% | 95% | 100% | 88%  |
| SUPT16H | 0.022 | 1.0 | 100% | 91% | 86%  | 100% |

**Table S5. Related to Figure 3.** List of Damage-associated molecular pattern (DAMP) molecules in this study.

| Type                | # of molecule | Proteins                                                                                                                                                                                                  |
|---------------------|---------------|-----------------------------------------------------------------------------------------------------------------------------------------------------------------------------------------------------------|
| S100s               | 18            | S100A1, S100A10, S100A11, S100A12, S100A13, S100A14, S100A16, S100A2, S100A3, S100A4, S100A6, S100A7, S100A7A, S100A8, S100A9, S100B, S100G, S100P                                                        |
| TLRs                | 6             | TLR2, TLR3, TLR4, TLR6, TLR7, TLR8                                                                                                                                                                        |
| Annexins            | 13            | ANXA1, ANXA10, ANXA11, ANXA13, ANXA2, ANXA2P2, ANXA3, ANXA4, ANXA5, ANXA6, ANXA7, ANXA8, ANXA9                                                                                                            |
| HMG molecules       | 12            | HMG20A, HMG20B, HMGA1, HMGA2, HMGB1, HMGB2, HMGB3, HMGN1, HMGN2, HMGN3, HMGN4, HMGN5                                                                                                                      |
| Integrins           | 28            | ITGA1, ITGA10, ITGA11, ITGA2, ITGA2B, ITGA3, ITGA4, ITGA5, ITGA6, ITGA7, ITGA8, ITGA9, ITGAD, ITGAE, ITGAL, ITGAM, ITGAV, ITGAX, ITGB1, ITGB1BP1, ITGB2, ITGB3, ITGB4, ITGB5, ITGB6, ITGB7, ITGB8, ITGBL1 |
| scavenger receptors | 7             | scavenger receptors, MSR1, SCARA3, SCARB1, SCARB2, SCARF1, SCARF2, SSC5D                                                                                                                                  |
| chemokine receptors | 6             | CCR1, CCR7, CCRL2, CXCR1, CXCR2, CXCR4                                                                                                                                                                    |
| Galectins           | 11            | CLC, LGALS1, LGALS2, LGALS3, LGALS3BP, LGALS4, LGALS7, LGALS8, LGALS9, LGALS9B, LGALS1                                                                                                                    |
| Fibrinogen          | 5             | FGA, FGB, FGG, FGL1, FGL2                                                                                                                                                                                 |
| ECM glycoproteins   | 43            | ACAN, ASPN, BCAN, BGN, CEMIP, CHAD, CHADL, CSPG4, DCN, FMOD, HABP2, HAPLN1, HAPLN3, HAPLN4, HAS1, HAS2, HAS3, HSPG2, HYAL2, HYAL3, IMPG2, KERA, LUM, LYVE1, MGEA5, NCAN, OGN, OMD, PAPLN,                 |
| Fibronectin         | 12            | Fibronectin, ELFN2, FANK1, FLRT1, FLRT2, FLRT3, FN1, FNDC1, FNDC3A, FSD1, FSD1L, FSD2, IGFN1                                                                                                              |
| Thioredoxin         | 15            | TMX1, TMX2, TMX3, TMX4, TXN, TXN2, TXNDC12, TXNDC17, TXNDC5, TXNDC9, TXNIP, TXNL1, TXNL4A, TXNRD1, TXNRD2                                                                                                 |
| Purinergic receptor | 5             | P2RX1, P2RX3, P2RX4, P2RX7, P2RY2                                                                                                                                                                         |
| Others              | 14            | A2M (CD91), AGER, BCL2, BSG, CALR, CALR3, CD14, CD2, CD36, CD44, FPR1, HAVCR2, IL1R1, IL6ST                                                                                                               |
| Total               | 195           |                                                                                                                                                                                                           |

**Table S6. Related to Figure 4.** Proteins defined as predictive for distinguishing tumor versus non-tumor based on tumor tissue-derived EVPs *versus* non-tumor tissue-derived EVP comparison.

| protein | protein name                                         | log <sub>10</sub> fold change (tumor / normal) | positivity in normal tissue (n=66) | positivity in tumor tissue (n=85) |
|---------|------------------------------------------------------|------------------------------------------------|------------------------------------|-----------------------------------|
| THBS2   | thrombospondin 2                                     | 5.1                                            | 12%                                | 74%                               |
| VCAN    | versican                                             | 5.1                                            | 17%                                | 75%                               |
| SRRT    | serrate, RNA effector molecule                       | 4.1                                            | 9%                                 | 62%                               |
| TNC     | tenascin C                                           | 3.5                                            | 9%                                 | 54%                               |
| DPYSL2  | dihydropyrimidinase like 2                           | 3.6                                            | 55%                                | 98%                               |
| AHCY    | adenosylhomocysteinase                               | 3.2                                            | 62%                                | 96%                               |
| DNAJA1  | DnaJ heat shock protein family (Hsp40) member A1     | 3.3                                            | 45%                                | 85%                               |
| PGK1    | phosphoglycerate kinase 1                            | 2.3                                            | 79%                                | 100%                              |
| EHD2    | EH domain containing 2                               | 1.0                                            | 68%                                | 87%                               |
| ADH1B   | alcohol dehydrogenase 1B (class I), beta polypeptide | -0.6                                           | 67%                                | 64%                               |
| CAVIN1  | caveolae associated protein 1                        | -1.1                                           | 53%                                | 42%                               |
| FGGY    | FGGY carbohydrate kinase domain containing           | -1.2                                           | 20%                                | 4%                                |
| ABCA3   | ATP binding cassette subfamily A member 3            | -1.7                                           | 32%                                | 12%                               |
| STX11   | syntaxin 11                                          | -2.8                                           | 38%                                | 1%                                |
| CAVIN2  | caveolae associated protein 2                        | -3.8                                           | 53%                                | 7%                                |
| CD36    | CD36 molecule                                        | -4.3                                           | 71%                                | 20%                               |

**Table S7. Related to Figure 6.** Proteins defined as predictive for distinguishing tumor *versus* non-tumor based on tumor plasma EVPs versus healthy control plasma-derived EVPs comparison.

| protein      | protein name                                                                 | log <sub>10</sub> fold change (tumor / normal) | positivity in normal plasma (n=43) | positivity in tumor plasma (n=77) |
|--------------|------------------------------------------------------------------------------|------------------------------------------------|------------------------------------|-----------------------------------|
| IGLC2        | immunoglobulin lambda constant 2                                             | 4.6                                            | 12%                                | 56%                               |
| KRT17        | keratin 17                                                                   | 3.0                                            | 7%                                 | 43%                               |
| IGHG1        | immunoglobulin heavy constant gamma 1                                        | 2.6                                            | 12%                                | 36%                               |
| KRT6B        | keratin 6B                                                                   | 2.4                                            | 7%                                 | 35%                               |
| FTL          | ferritin light chain                                                         | 2.2                                            | 49%                                | 70%                               |
| RDX          | radixin                                                                      | 1.9                                            | 0%                                 | 25%                               |
| CFL1         | cofilin 1                                                                    | 1.9                                            | 26%                                | 49%                               |
| PRSS1        | protease, serine 1                                                           | 1.8                                            | 0%                                 | 22%                               |
| TUBA1C       | tubulin alpha 1c                                                             | 1.8                                            | 7%                                 | 30%                               |
| ADAMTS13     | ADAM metalloproteinase with thrombospondin type 1 motif 13                   | 1.8                                            | 12%                                | 35%                               |
| IGKV6D-21    | immunoglobulin kappa variable 6D-21                                          | 1.7                                            | 16%                                | 38%                               |
| YWHAQ        | tyrosine 3-monooxygenase/tryptophan 5-monooxygenase activation protein theta | 1.7                                            | 16%                                | 38%                               |
| POTEI        | POTE ankyrin domain family member I                                          | 1.4                                            | 0%                                 | 17%                               |
| POTEE        | POTE ankyrin domain family member F                                          | 1.2                                            | 0%                                 | 14%                               |
| VWF          | von Willebrand factor                                                        | 0.9                                            | 98%                                | 97%                               |
| ACTG1        | actin gamma 1                                                                | -2.1                                           | 93%                                | 64%                               |
| IGLV3-27     | immunoglobulin lambda variable 3-27                                          | -2.1                                           | 86%                                | 57%                               |
| IGKV1D-12    | immunoglobulin kappa variable 1D-12                                          | -2.2                                           | 58%                                | 25%                               |
| F11          | coagulation factor XI                                                        | -2.3                                           | 91%                                | 58%                               |
| C1RL         | complement C1r subcomponent like                                             | -2.4                                           | 86%                                | 64%                               |
| ATRN         | attractin                                                                    | -2.4                                           | 84%                                | 53%                               |
| BCHE         | butyrylcholinesterase                                                        | -2.4                                           | 84%                                | 53%                               |
| IGHV3-35     | immunoglobulin heavy variable 3-35                                           | -2.5                                           | 70%                                | 43%                               |
| IGKV1-17     | immunoglobulin kappa variable 1-17                                           | -2.7                                           | 100%                               | 66%                               |
| C1QTNF3      | C1q and TNF related 3                                                        | -3.0                                           | 63%                                | 25%                               |
| IGHV3-20     | immunoglobulin heavy variable 3-20                                           | -3.2                                           | 86%                                | 55%                               |
| IGHV3OR15-7  | immunoglobulin heavy variable 3/OR15-7                                       | -3.3                                           | 79%                                | 39%                               |
| COLEC11      | collectin subfamily member 11                                                | -3.4                                           | 84%                                | 40%                               |
| IGHD         | immunoglobulin heavy constant delta                                          | -3.5                                           | 77%                                | 35%                               |
| IGKV3D-11    | immunoglobulin kappa variable 3D-11                                          | -3.6                                           | 100%                               | 61%                               |
| IGHV3OR16-10 | immunoglobulin heavy variable 3/OR16-10                                      | -3.9                                           | 86%                                | 47%                               |
| IGKV2D-24    | immunoglobulin kappa variable 2D-24                                          | -4.1                                           | 86%                                | 39%                               |
| IGKV2-40     | immunoglobulin kappa variable 2-40                                           | -4.1                                           | 88%                                | 44%                               |
| IGKV1-27     | immunoglobulin kappa variable 1-27                                           | -4.4                                           | 79%                                | 22%                               |
| IGHV3OR16-9  | immunoglobulin heavy variable 3/OR16-9                                       | -4.4                                           | 88%                                | 44%                               |
| IGLV5-45     | immunoglobulin lambda variable 5-45                                          | -4.4                                           | 72%                                | 18%                               |
| IGHV3OR16-13 | immunoglobulin heavy variable 3/OR16-13                                      | -4.6                                           | 77%                                | 27%                               |
| IGHV1-46     | immunoglobulin heavy variable 1-46                                           | -4.7                                           | 72%                                | 16%                               |
| IGHV4-39     | immunoglobulin heavy variable 4-39                                           | -5.0                                           | 93%                                | 38%                               |
| IGHV3-11     | immunoglobulin heavy variable 3-11                                           | -5.0                                           | 95%                                | 43%                               |
| IGLC3        | immunoglobulin lambda constant 3                                             | -5.2                                           | 77%                                | 27%                               |
| IGKV1-6      | immunoglobulin kappa variable 1-6                                            | -5.5                                           | 67%                                | 1%                                |
| PON3         | paraoxonase 3                                                                | -5.6                                           | 72%                                | 5%                                |
| IGHV3-21     | immunoglobulin heavy variable 3-21                                           | -5.7                                           | 70%                                | 9%                                |
| IGHV7-4-1    | immunoglobulin heavy variable 7-4-1                                          | -5.8                                           | 74%                                | 10%                               |
| IGKV2D-30    | immunoglobulin kappa variable 2D-30                                          | -6.0                                           | 67%                                | 0%                                |
| IGLC6        | immunoglobulin lambda constant 6                                             | -7.1                                           | 70%                                | 1%                                |

**Table S8. Related to STAR Methods.** Targeted peptides from top 20 PaCa plasma EVP markers. Peptides were identified from the fractionated library and targeted in a PRM experiment. LRR26 were not identified in the fractionated library.

| Protein  | Sequence                  | m/z      |
|----------|---------------------------|----------|
| CA2      | VVDVLDSIK                 | 494.2899 |
| CA2      | LNFNAGEGEPEELMVDNWRPAQPLK | 928.4528 |
| CD55     | LTCLQNLK                  | 495.2758 |
| GLIPR2   | EAQQYSEALASTR             | 727.3489 |
| KRAS     | LVVVGAGGVGK               | 478.2999 |
| P4HB     | NFEDVAFDEK                | 607.2726 |
| PEBP1    | VLTPQVK                   | 443.2735 |
| PEBP1    | GNDISSGTVLSDYVGSPPK       | 975.4741 |
| PSMA4    | LLDEVFFSEK                | 613.8192 |
| PSMA4    | SALALAIK                  | 393.7577 |
| PACSIN2  | ASLMNDDFEK                | 585.2604 |
| PACSIN2  | ADPSLNPEQLK               | 606.3199 |
| TGM2     | LVVNFESDK                 | 525.7772 |
| TGM2     | TVEIPDPVEAGEEVK           | 806.4084 |
| PTPRJ    | GDPLGTEGGLDASNTER         | 844.8867 |
| PTPRJ    | QQADSNCGFEEYEDLK          | 668.6134 |
| ABCB1    | LVTMQTAGNEVELENAADESK     | 750.3574 |
| ABCB1    | NTTGALTR                  | 467.7527 |
| ABCB1    | VVQEALDK                  | 451.253  |
| XPNPEP2  | TVHWGTPSAFQK              | 453.5659 |
| XPNPEP2  | GTVDEFSGAEIVDK            | 733.8526 |
| XPNPEP2  | LIFPAATSGR                | 516.7961 |
| ADGRG6   | TGLFQDVGPQRK              | 673.3628 |
| ADGRG6   | TQEVHHPICAFWDLNK          | 665.6566 |
| ADGRG6   | TIDELAFK                  | 468.7555 |
| ABCB11   | ILLLDEATSALDTESEK         | 924.4762 |
| ABCB11   | VNVQFLR                   | 438.2581 |
| ABCB11   | SLNIQWLR                  | 515.2944 |
| ITGA1    | EYAQRIPSGGDGK             | 689.3411 |
| ITGA1    | DSNTDILLVGAPMYMGTEK       | 1027.991 |
| ITGA1    | WVLIGSPLVGQPK             | 697.4135 |
| LTF      | QVLLHQQAK                 | 532.8135 |
| LTF      | SNLCALCIGDEQGENK          | 904.4007 |
| LTF      | DVTVLQNTDGNNEAWAK         | 994.9688 |
| ALPL     | SVGIVTTTR                 | 467.2717 |
| ALPL     | FPFVALSK                  | 454.7662 |
| ALPL     | LNTNVAK                   | 380.2217 |
| SRI      | LSPQAVNSIAK               | 564.324  |
| SRI      | SGTVDPQELQK               | 601.3076 |
| SRI      | ALTTMGFRLSPQAVNSIAK       | 669.0334 |
| BAIAP2L1 | LNESLDENFK                | 604.794  |
| BAIAP2L1 | TIFPHTAGSNK               | 586.8076 |
| BAIAP2L1 | VNNSTGTSEDPSLQR           | 802.8797 |
